# Supplementary material for: Different Outcomes of Experimental Hepatitis E Virus Infection in Diverse Mouse Strains, Wistar Rats, and Rabbits
Source: MDPI journal article supplement (doi:10.3390/v11010001), 2018-12-20
Supplement: s1 [file s1]

## Supplemental Figure S1. Amplification curve of HEV specific qRT-PCR

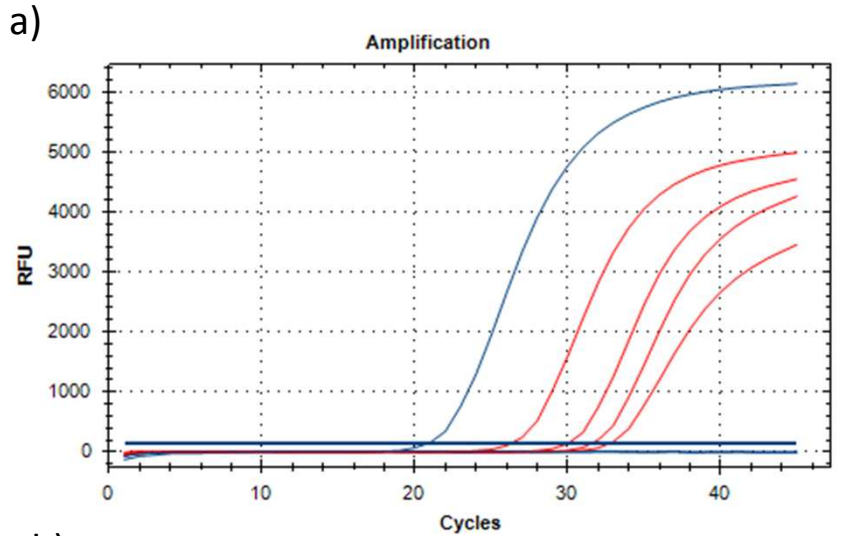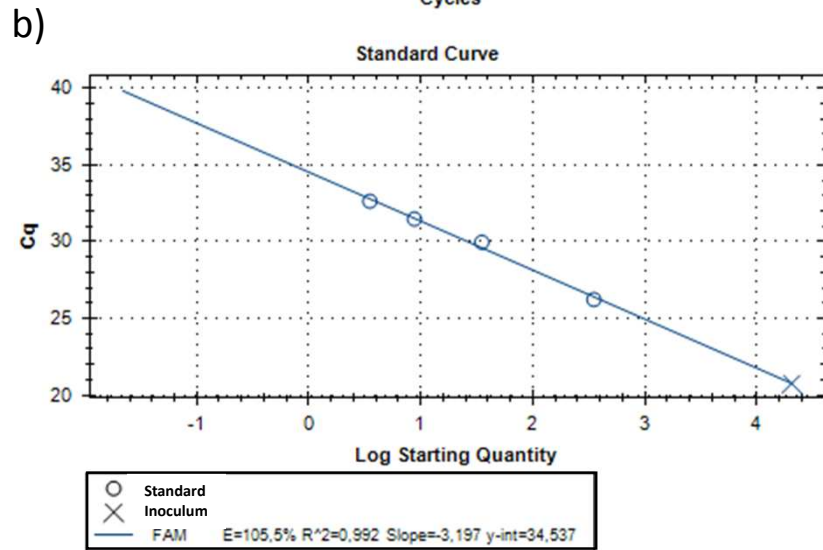

c)

| Sample                               | Ct    | Copies per $\mu$ l RNA | Copies per ml sample* |
|--------------------------------------|-------|------------------------|-----------------------|
| HEV standard ( $10^{-2}$ dilution)   | 26,23 | $3,50 \times 10^2$     | $1,25 \times 10^5$    |
| HEV standard ( $10^{-3}$ dilution)   | 29,97 | $3,50 \times 10^1$     | $1,25 \times 10^4$    |
| HEV standard ( $10^{-3/4}$ dilution) | 31,49 | 8,75                   | $3,12 \times 10^3$    |
| HEV standard ( $10^{-4}$ dilution)   | 32,65 | 3,5                    | $1,25 \times 10^3$    |
| Liver homogenate (inoculum)          | 20,76 | $2,04 \times 10^4$     | $7,3 \times 10^6$     |
| Negative control                     | N/A   | N/A                    | N/A                   |

### Supplemental Figure S1

a) Amplification curve of HEV specific qRT-PCR targeting the HEV standard (red line) and the RNA extracts from the inoculum (blue line).

b) Standard curves were obtained by Ct values plotted against the log starting quantity.

c) Obtained Ct values and determined copy numbers. The concentration [copies/ $\mu$ l RNA] was obtained from 140 $\mu$ l samples eluted in a 50 $\mu$ l volume. The corresponding conversion factor to calculate copies per ml sample is 357,12
